# Supplementary material for: Unveiling the anchoring and catalytic effect of Co@C3N3 monolayer as a high-performance selenium host material in lithium–selenium batteries: a first-principles study
Source: Royal Society of Chemistry journal article supplement (doi:10.1039/d3cp01902k), 2023-01-01
Supplement: d3cp01902k1.pdf [file d3cp01902k1.pdf]

# **Unveiling the anchoring and catalytic effect of Co@C<sub>3</sub>N<sub>3</sub> monolayer as a high-performance selenium host material in lithium-selenium batteries: A first- principles study**

Shuwei Tang,<sup>\*a</sup> Wentao Liu,<sup>a</sup> Zehui Yang,<sup>a</sup> Chenchen Liu,<sup>a</sup> Shulin Bai,<sup>a</sup> Jingyi Zhang,<sup>a</sup>  
and Dongming Luo<sup>a</sup>

<sup>a</sup>College of Materials Science and Engineering, Liaoning Technical University, Fuxin,  
Liaoning 123000, China.

Corresponding author:

Shuwei Tang

E-mail: tangsw911@nenu.edu.cn

College of Materials Science and Engineering

Liaoning Technical University

Zhonghua Road. #47

Fuxin, Liaoning

123000, China

Tel/Fax: +86-418-5110098

# Contents

|                                                                                |    |
|--------------------------------------------------------------------------------|----|
| <b>Section 1.</b> Adsorption sites for cobalt on $C_3N_3$ monolayer .....      | S3 |
| <b>Section 2.</b> $Co@C_3N_3$ -LiPSes structure and the binding energies ..... | S5 |
| <b>References</b> .....                                                        | S6 |

## Section 1. Adsorption sites for cobalt on $C_3N_3$ monolayer

In order to determine the optimal adsorption position of cobalt on  $C_3N_3$  material, the embedding of cobalt in the N6 cavity of the intrinsic  $C_3N_3$  monolayer are explored, as depicted in **Fig. S1(a)**. With reference to the embedding site of cobalt in N6 cavity, three possible sites, namely the Co1 (between two nitrogen atoms), Co2 (between three nitrogen atoms) and Co3 (centre of six nitrogen atoms) are evaluated.<sup>1,2</sup> The configurations and relative energies and of Co atom at three embedding sites in the intrinsic  $C_3N_3$  monolayer are presented in the **Fig. S1(b)**.

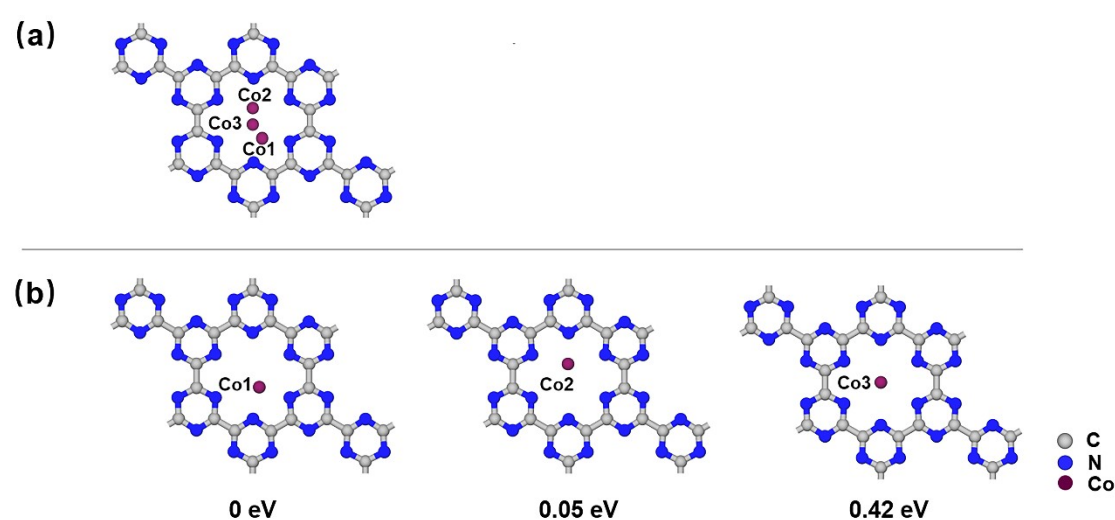

**Fig. S1. (a)** Three adsorption sites for Co atom on  $C_3N_3$  monolayer. **(b)** Configurations and relative energies and of Co atom at the three embedding sites in the intrinsic  $C_3N_3$  monolayer.

Actually, the transition metal atoms tend to agglomerate on the substrate because of the large cohesive energy.<sup>3</sup> Furthermore, to check the stability of  $Co@C_3N_3$ , the binding energy (contrary to the definition of formation energy) of transition metal cobalt at the three adsorption sites are further evaluated, and the calculated results and the differences ( $\Delta E_{diff}$ ) between the binding energies and the corresponding cohesive energies in bulk phase are surmised in **Table S1**. The binding energy ( $E_b$ ) is defined as the following equation:

$$E_b = E_{C_3N_3} + E_{Co} - E_{Co@C_3N_3} \quad (1)$$

Where  $E_{C_3N_3}$ ,  $E_{Co}$  and  $E_{Co@C_3N_3}$  are the total energies of  $C_3N_3$  monolayer, Co atom and  $Co@C_3N_3$  system, respectively. From **Table S1**, the binding energy at Co1 site is the largest among the considered three binding sites. Notably, the binding energy at Co1 site surpasses the cohesion energy by 0.18eV, which indicates that Co could be effectively and tightly trapped at the Co1 site without the encountering any clustering issues.<sup>4</sup>

**Table S1:** The binding energy of cobalt atom embedded at Co1, Co2 and Co3 sites ( $E_b$ , eV), the cohesive energy of the cobalt metal bulk ( $E_{coh}$ , eV), and the difference between  $E_b$ -Co1 and cohesive energy of the cobalt crystal ( $\Delta E_{diff}$ , eV). \* From reference.<sup>5,6</sup>

|                    | $E_b$ -Co1 | $E_b$ -Co2 | $E_b$ -Co3 | $E_{coh}$ * | $\Delta E_{diff}$ |
|--------------------|------------|------------|------------|-------------|-------------------|
| <b>Energy (eV)</b> | 4.57       | 4.52       | 4.15       | 4.39        | 0.18              |

## Section 2. Co@C<sub>3</sub>N<sub>3</sub>-LiPSes structure and the binding energies

**Table S2.** Structures and the binding energies of LiPSes clusters on Co@C<sub>3</sub>N<sub>3</sub> monolayer at the different adsorption positions.

| structures<br>$E_b$                                                                                  | Li <sub>2</sub> Se-Co@C <sub>3</sub> N <sub>3</sub>                                                  | Li <sub>2</sub> Se <sub>2</sub> -Co@C <sub>3</sub> N <sub>3</sub>                                      | Li <sub>2</sub> Se <sub>4</sub> -Co@C <sub>3</sub> N <sub>3</sub>                                      | Li <sub>2</sub> Se <sub>6</sub> -Co@C <sub>3</sub> N <sub>3</sub>                                      | Li <sub>2</sub> Se <sub>8</sub> -Co@C <sub>3</sub> N <sub>3</sub>                                      | Se <sub>8</sub> -Co@C <sub>3</sub> N <sub>3</sub> |
|------------------------------------------------------------------------------------------------------|------------------------------------------------------------------------------------------------------|--------------------------------------------------------------------------------------------------------|--------------------------------------------------------------------------------------------------------|--------------------------------------------------------------------------------------------------------|--------------------------------------------------------------------------------------------------------|---------------------------------------------------|
| 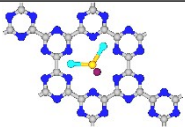<br>$E_b=3.64$ eV   | <br>$E_b=2.72$ eV   | <br>$E_b=1.88$ eV   | <br>$E_b=1.76$ eV   | <br>$E_b=1.97$ eV   | <br>$E_b=1.10$ eV   |                                                   |
| <br>$E_b=3.05$ eV   | <br>$E_b=2.38$ eV   | <br>$E_b=1.57$ eV   | <br>$E_b=1.44$ eV   | <br>$E_b=1.23$ eV   | <br>$E_b=0.92$ eV   |                                                   |
| <br>$E_b=2.70$ eV  | <br>$E_b=2.27$ eV  | <br>$E_b=1.30$ eV  | <br>$E_b=1.30$ eV  | <br>$E_b=1.10$ eV  | <br>$E_b=0.78$ eV  |                                                   |
| <br>$E_b=2.57$ eV | <br>$E_b=0.85$ eV | <br>$E_b=1.27$ eV | <br>$E_b=0.98$ eV | <br>$E_b=1.04$ eV | <br>$E_b=0.74$ eV |                                                   |

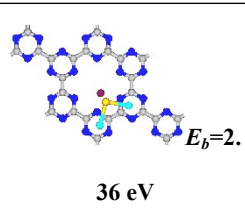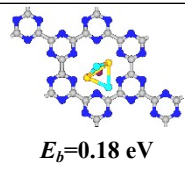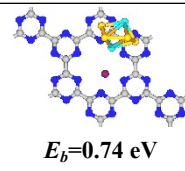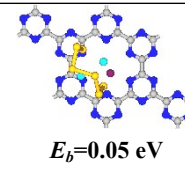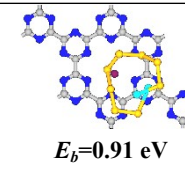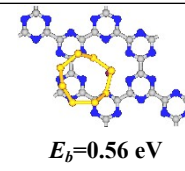

## References

- [1] Q. Bing, W. Liu, W. Yi and J.-Y. Liu, *J. Power Sources*, 2019, **413**, 399-407.
- [2] D. Jiao, Y. Tian, H. Wang, Q. Cai and J. Zhao, *Phys. Chem. Chem. Phys.*, 2020, **22**, 16691-16700.
- [3] X. Zhang, A. Chen, Z. Zhang, M. Jiao and Z. Zhou, *J. Mater. Chem.*, 2018, **6**, 11446–11452
- [4] H. Lin, R. Jin, A. Wang, S. Zhu and H. Li, *Ceram. Int.*, 2019, **45**, 17996-18002.
- [5] Y. Liu, Z. Meng, X. Guo, G. Xu, D. Rao, Y. Wang, K. Deng and R. Lu, *Phys. Chem. Chem. Phys.*, 2017, **19**, 28323–28329.
- [6] C. Kittel, *Introduction to Solid State Physics*, John Wiley & Sons, New York, 7th Edition, 1996.
